# Supplementary material for: Predictability of Western Himalayan river flow: melt seasonal inflow into Bhakra Reservoir in northern India
Source: Copernicus journal article supplement (doi:10.5194/hess-17-2131-2013), 2013-06-05
Supplement: Supplementary file 1 [file hess-17-2131-2013-supplement.pdf]

Supplement – List of Abbreviations

|               |                                  |
|---------------|----------------------------------|
| AIC           | Akaike Information Criteria      |
| ANN           | Artificial Neural Network        |
| BBMB          | Bhakra Beas Management Board     |
| BIC           | Bayesian Information Criteria    |
| BSL           | Beas Satluj Link                 |
| CCA           | Canonical Correlation Analysis   |
| DTR           | Diurnal Temperature Range        |
| ENSO          | El-Nino Southern Oscillation     |
| GCV           | Generalized Cross Validation     |
| IC            | Information Criteria             |
| IMD           | Indian Meteorological Department |
| KNN           | K-nearest neighbor               |
| MAMJ          | March-April-May-June             |
| $N_{DTR}$     | November DTR                     |
| $N_Q$         | November flow                    |
| $N_R$         | November rainfall                |
| $N_S$         | November snow                    |
| $N_{T_{avg}}$ | November average temperature     |
| $N_{T_{max}}$ | November maximum temperature     |
| $N_{T_{min}}$ | November minimum temperature     |
| NAO           | North Atlantic Oscillation       |
| PCR           | Principal Component Regression   |
| PLSR          | Partial Least Squares Regression |
| SOI           | Southern Oscillation Index       |
| SST           | Sea Surface Temperature          |
| $T_{avg}$     | Average temperature              |
| $T_{max}$     | Maximum temperature              |
| $T_{min}$     | Minimum temperature              |
